# Supplementary material for: Closed-Form Approximations for Optimal (r, q) and (S, T) Policies in a Parallel Processing Environment
Source: Atypon-hosted journal article supplement (doi:10.1287/opre.2017.1623), 2017-07-19
Supplement: opre.2017.1623-sm.pdf [file opre.2017.1623-sm.pdf]

## Electronic Companion to “Closed-Form Approximations for Optimal $(r, q)$ and $(S, T)$ Policies in a Parallel Processing Environment”

*Proof:* [of Lemma 3] First we prove (41). By Proposition 3.1 in Yamazaki et al. (1992),

$$\mathbb{E}\left(N^\lambda - \frac{\rho^\lambda}{q^\lambda}\right)^2 \leq \frac{\rho^\lambda}{q^\lambda} + 2\frac{\lambda}{q^\lambda} \cdot \frac{\theta}{\sqrt{q^\lambda}} \mathbb{E}L_{(2)}.$$

By the definition of  $Y^\lambda(q^\lambda)$  given by (19) and  $\left|\lim_{\lambda \rightarrow \infty} z^\lambda(i^\lambda, q^\lambda)\right| < \infty$ , there exists a constant  $M$  such that

$$\mathbb{E}\left(z^\lambda(i^\lambda, q^\lambda) - Y^\lambda(q^\lambda)\right)^2 \leq M.$$

Thus, the function  $\hat{G}(\cdot)$  is uniformly integrable relative to the sequence of distribution functions given by  $(z^\lambda(i^\lambda, q^\lambda) - Y^\lambda(q^\lambda))$ . Hence, (41) directly follows from Theorem 2 on p.276 in Chow and Teicher (2003) and Lemma 2 (as Condition 1 holds and  $\lim_{\lambda \rightarrow \infty} z^\lambda(i^\lambda, q^\lambda)$  exists).

Now we prove (42). This approximation result is mentioned by Zheng (1992) (see p.89, Zheng 1992). It may be hidden in some textbooks. For the completeness, here we give a proof. It suffices to show that for any  $\varepsilon > 0$ , there exists an  $\Lambda$  such that for  $\lambda > \Lambda$ ,

$$\left| \sum_{i=r^\lambda+1}^{r^\lambda+q^\lambda} C(z^\lambda(i, q^\lambda)) - \int_{r^\lambda}^{r^\lambda+q^\lambda} C(z^\lambda(x, q^\lambda)) dx \right| \leq \varepsilon \times \int_{r^\lambda}^{r^\lambda+q^\lambda} C(z^\lambda(x, q^\lambda)) dx. \quad (\text{A-1})$$

Note that

$$\begin{aligned} & \sum_{i=r^\lambda+1}^{r^\lambda+q^\lambda} C(z^\lambda(i, q^\lambda)) - \int_{r^\lambda}^{r^\lambda+q^\lambda} C(z^\lambda(x, q^\lambda)) dx \\ &= \sum_{i=r^\lambda+1}^{r^\lambda+q^\lambda} \left[ C(z^\lambda(i, q^\lambda)) - \int_{i-1}^i C(z^\lambda(x, q^\lambda)) dx \right] \\ &= \sum_{i=r^\lambda+1}^{r^\lambda+q^\lambda} \int_{i-1}^i \left[ C(z^\lambda(i, q^\lambda)) - C(z^\lambda(x, q^\lambda)) \right] dx. \end{aligned} \quad (\text{A-2})$$

Using (35) and the convexity of  $C(\cdot)$ , for  $i = r^\lambda + 1, \dots, r^\lambda + q^\lambda$  and  $x \in [i-1, i]$ , if  $z_* \notin (z^\lambda(i, q^\lambda), z^\lambda(i+1, q^\lambda))$ , then

$$\begin{aligned} \left| C(z^\lambda(i, q^\lambda)) - C(z^\lambda(x, q^\lambda)) \right| &\leq \left| C(z^\lambda(i+1, q^\lambda)) - C(z^\lambda(i, q^\lambda)) \right| \\ &= h \times \left| \Phi^1(-z^\lambda(i+1, q^\lambda)) - \Phi^1(-z^\lambda(i, q^\lambda)) \right| \end{aligned}$$

$$\begin{aligned}
& +p \times \left| \Phi^1(z^\lambda(i+1, q^\lambda)) - \Phi^1(z^\lambda(i, q^\lambda)) \right| \\
& \leq \frac{p}{\sigma^\lambda(q^\lambda)\sqrt{\lambda q^\lambda}} + \frac{h}{\sigma^\lambda(q^\lambda)\sqrt{\lambda q^\lambda}}, \tag{A-3}
\end{aligned}$$

and if  $z_* \in (z^\lambda(i, q^\lambda), z^\lambda(i+1, q^\lambda))$ , then

$$\begin{aligned}
& \left| C(z^\lambda(i, q^\lambda)) - C(z^\lambda(x, q^\lambda)) \right| \\
& \leq \max \left\{ C(z^\lambda(i+1, q^\lambda)) - C(z_*), C(z^\lambda(i, q^\lambda)) - C(z_*) \right\}. \tag{A-4}
\end{aligned}$$

By Conditions 1–2, there exists an  $\Lambda_0$  such that for  $\lambda > \Lambda_0$ ,

$$\left| z^\lambda(i, q^\lambda) \right| \leq M + 1, \quad i = r^\lambda + 1, \dots, r^\lambda + q^\lambda. \tag{A-5}$$

Thus, for  $i = r^\lambda + 1, \dots, r^\lambda + q^\lambda$ ,

$$\int_{i-1}^i C(z^\lambda(x, q^\lambda)) \, dx \geq h \times \Phi^1(M+1) + p \times \Phi^1(M+1). \tag{A-6}$$

From the definition of  $\sigma^\lambda(q^\lambda)$  given by (17) and (A-6), for any  $\varepsilon > 0$ , there exists an  $\Lambda_1$  such that for  $\lambda > \Lambda_1$ ,

$$\frac{p}{\sigma^\lambda(q^\lambda)\sqrt{\lambda q^\lambda}} + \frac{h}{\sigma^\lambda(q^\lambda)\sqrt{\lambda q^\lambda}} \leq \varepsilon \times \int_{i-1}^i C(z^\lambda(x, q^\lambda)) \, dx. \tag{A-7}$$

Combining (A-3) and (A-7) yields that for  $i$  with  $z_* \notin (z^\lambda(i, q^\lambda), z^\lambda(i+1, q^\lambda))$ ,

$$\int_{i-1}^i \left| C(z^\lambda(i, q^\lambda)) - C(z^\lambda(x, q^\lambda)) \right| \, dx \leq \varepsilon \times \int_{i-1}^i C(z^\lambda(x, q^\lambda)) \, dx. \tag{A-8}$$

With the help of (35), for  $i$  with  $z_* \in (z^\lambda(i, q^\lambda), z^\lambda(i+1, q^\lambda))$ , similarly, we can show that there exists an  $\Lambda_2$  such that for  $\lambda > \Lambda_2$ ,

$$\max \left\{ C(z^\lambda(i+1, q^\lambda)) - C(z_*), C(z^\lambda(i, q^\lambda)) - C(z_*) \right\} \leq \varepsilon \times \int_{i-1}^i C(z^\lambda(x, q^\lambda)) \, dx. \tag{A-9}$$

Combining (A-4) and (A-9) yields that for  $i$  with  $z_* \in (z^\lambda(i, q^\lambda), z^\lambda(i+1, q^\lambda))$ ,

$$\int_{i-1}^i \left| C(z^\lambda(i, q^\lambda)) - C(z^\lambda(x, q^\lambda)) \right| \, dx \leq \varepsilon \times \int_{i-1}^i C(z^\lambda(x, q^\lambda)) \, dx. \tag{A-10}$$

Therefore, (A-1) holds for  $\lambda > \max\{\Lambda_0, \Lambda_1, \Lambda_2\}$  directly from (A-2), (A-8) and (A-10). Thus the validity of the approximation given by (42) is proved. ■

*Proof :* [of Lemma 4] In view of (14) and (38), it suffices to show that

$$\lim_{\lambda \rightarrow \infty} \left( q^\lambda \cdot \mathbb{E} \left[ \hat{G} \left( IN^\lambda \right) \right] \right) / \left( \gamma^\lambda(q^\lambda) \int_{r^\lambda}^{r^\lambda + q^\lambda} C(z^\lambda(x, q^\lambda)) dx \right) = 1.$$

It follows from Lemma 3 that this is equivalent to show that

$$\lim_{\lambda \rightarrow \infty} \left( q^\lambda \cdot \mathbb{E} \left[ \hat{G} \left( IN^\lambda \right) \right] \right) / \left( \gamma^\lambda(q^\lambda) \sum_{i=r^\lambda+1}^{r^\lambda+q^\lambda} C(z^\lambda(i, q^\lambda)) \right) = 1. \quad (\text{A-11})$$

To prove (A-11), in view of (A-39), we only need to show that

$$\begin{aligned} & \lim_{\lambda \rightarrow \infty} \left( q^\lambda \sum_{i=r^\lambda+1}^{r^\lambda+q^\lambda} \mathbb{E} \left[ I \left\{ J^\lambda = r^\lambda + q^\lambda - i \right\} \times \hat{G} \left( z^\lambda(i, q^\lambda) - Y^\lambda(q^\lambda) \right) \right] \right) / \left( \sum_{i=r^\lambda+1}^{r^\lambda+q^\lambda} C(z^\lambda(i, q^\lambda)) \right) \\ & = 1. \end{aligned} \quad (\text{A-12})$$

To that end, we first consider each summand. Similar to (A-40), we have that

$$\begin{aligned} & \mathbb{E} \left[ I \left\{ J^\lambda = r^\lambda + q^\lambda - i \right\} \times \hat{G} \left( z^\lambda(i, q^\lambda) - Y^\lambda(q^\lambda) \right) \right] \\ & = \int_{-\infty}^{\infty} \hat{G} \left( z^\lambda(i, q^\lambda) - y \right) d\Pr \left( Y^\lambda(q^\lambda) \leq y, J^\lambda = r^\lambda + q^\lambda - i \right). \end{aligned} \quad (\text{A-13})$$

By the first part of Theorem 1 and Theorem 1.A.3 on p.6, Shaked and Shanthikumar (2007), we know that

$$\int_{-\infty}^{\infty} \hat{G} \left( z^\lambda(i, q^\lambda) - y \right) d\Pr \left( Y^\lambda(q^\lambda) \leq y, J^\lambda = r^\lambda + q^\lambda - i \right) \quad (\text{A-14})$$

$$\leq \frac{1}{q^\lambda} \mathbb{E} \left[ h \cdot \left( z^\lambda(i, q^\lambda) + \beta^\lambda(q^\lambda) - Y^\lambda(q^\lambda) \right)^+ + p \cdot \left( Y^\lambda(q^\lambda) + \beta^\lambda(q^\lambda) - z^\lambda(i, q^\lambda) \right)^+ \right];$$

$$\int_{-\infty}^{\infty} \hat{G} \left( z^\lambda(i, q^\lambda) - y \right) d\Pr \left( Y^\lambda(q^\lambda) \leq y, J^\lambda = r^\lambda + q^\lambda - i \right) \quad (\text{A-15})$$

$$\geq \frac{1}{q^\lambda} \mathbb{E} \left[ h \cdot \left( z^\lambda(i, q^\lambda) - \beta^\lambda(q^\lambda) - Y^\lambda(q^\lambda) \right)^+ + p \cdot \left( Y^\lambda(q^\lambda) - \beta^\lambda(q^\lambda) - z^\lambda(i, q^\lambda) \right)^+ \right].$$

Similar to the proof of (41) in Lemma 3, we can, by Conditions 1–2, show that

$$\begin{aligned} & \lim_{\lambda \rightarrow \infty} \mathbb{E} \left[ h \cdot \left( z^\lambda(i, q^\lambda) + \beta^\lambda(q^\lambda) - Y^\lambda(q^\lambda) \right)^+ + p \cdot \left( Y^\lambda(q^\lambda) + \beta^\lambda(q^\lambda) - z^\lambda(i, q^\lambda) \right)^+ \right] \\ & = \lim_{\lambda \rightarrow \infty} \mathbb{E} \left[ h \cdot \left( z^\lambda(i, q^\lambda) - \beta^\lambda(q^\lambda) - Y^\lambda(q^\lambda) \right)^+ + p \cdot \left( Y^\lambda(q^\lambda) - \beta^\lambda(q^\lambda) - z^\lambda(i, q^\lambda) \right)^+ \right] \\ & = \lim_{\lambda \rightarrow \infty} C \left( z^\lambda(i, q^\lambda) \right). \end{aligned} \quad (\text{A-16})$$

Combining (A-13)-(A-16) yields that

$$\lim_{\lambda \rightarrow \infty} q^\lambda \cdot \mathbb{E} \left[ I \left\{ J^\lambda = r^\lambda + q^\lambda - i \right\} \times \hat{G} \left( z^\lambda(i, q^\lambda) - Y^\lambda(q^\lambda) \right) \right] = \lim_{\lambda \rightarrow \infty} C \left( z^\lambda(i, q^\lambda) \right),$$

which implies that (A-12) holds. Therefore, the lemma is proved. ■

*Proof:* [of Lemma 6] If  $K > 0$ , from (58), we know that  $\tau \neq 0$ . Thus for positive  $\tau$  and  $\eta$ , by the strict convexity of  $C(\cdot)$ , we know that there exists a unique  $\alpha \in (0, 1)$  (write as  $g(\tau)$ ) such that

$$C(z_* - g(\tau)\tau\eta) = C(z_* + (1 - g(\tau))\tau\eta).$$

Furthermore, this, by the strict convexity of  $C(\cdot)$ , implies that

$$\frac{d(g(\tau)\tau)}{d\tau} = \frac{C'(z_* + (1 - g(\tau))\tau\eta)}{C'(z_* + (1 - g(\tau))\tau\eta) - C'(z_* - g(\tau)\tau\eta)} \neq 0.$$

Plugging  $g(\tau)$  into (58), we have

$$-\eta K + \tau \times C(z_* - g(\tau)\tau\eta) - \frac{1}{\eta} \int_{z_* - g(\tau)\tau\eta}^{z_* + (1 - g(\tau))\tau\eta} C(y) dy = 0.$$

Taking derivative on the left-hand side with respect to  $\tau$ , we have

$$-\tau C'(z_* - g(\tau)\tau\eta) \cdot \frac{d(g(\tau)\tau)}{d\tau} \neq 0.$$

The existence of  $\tau$  directly follows from the implicit function theorem (see Theorem 9.28 on p.224 of Rudin 1976).

Finally we show that  $\tau \in (0, \infty)$ .  $\tau \neq 0$  directly follows from  $K > 0$ ,  $\eta > 0$ , and (58). Suppose contrariwise that  $\tau < 0$ . From (58), we have

$$\eta^2 K = \tau\eta \times C(z_* - \alpha\tau\eta) - \int_{z_* - \alpha\tau\eta}^{z_* + (1 - \alpha)\tau\eta} C(y) dy.$$

This is equivalent to

$$\eta^2 K = \int_{z_* - \alpha\tau\eta}^{z_* + (1 - \alpha)\tau\eta} (C(z_* - \alpha\tau\eta) - C(y)) dy. \quad (\text{A-17})$$

By (59) and the convexity of  $C(\cdot)$ , and noticing that  $z_* + (1 - \alpha)\eta\tau < z_* - \alpha\eta\tau$  if  $\tau < 0$ , we have that

$$C(z_* - \alpha\eta\tau) - C(y) \geq 0 \quad \text{for } y \in [z_* + (1 - \alpha)\eta\tau, z_* - \alpha\eta\tau].$$

This implies that

$$\int_{z_* - \alpha\eta\tau}^{z_* + (1 - \alpha)\eta\tau} (C(z_* - \alpha\eta\tau) - C(y)) dy \leq 0.$$

Thus we get a contradiction from (A-17) as  $\eta^2 K > 0$ . Hence,  $\tau \in (0, \infty)$ . Thus, the proof of the lemma is completed. ■

*Proof:* [of Lemma 7] By the definitions of  $\sigma^\lambda(q^\lambda)$  and  $\beta^\lambda(q^\lambda)$  given by (17)-(18), in view of (46), it is sufficient to consider the differentiability of  $\kappa(q^\lambda)$ . By the strictly convexity of  $C(\cdot)$  (see (36)), we know the continuity of  $\kappa(\cdot)$ . Using (45), for any  $\delta > 0$ ,

$$\begin{aligned} & C(z_* - \kappa(q^\lambda + \delta)) - C(z_* - \kappa(q^\lambda)) \\ &= C(z_* + \beta^\lambda(q^\lambda + \delta) - \kappa(q^\lambda + \delta)) - C(z_* + \beta^\lambda(q^\lambda) - \kappa(q^\lambda)). \end{aligned}$$

This implies that

$$\begin{aligned} & \frac{\kappa(q^\lambda + \delta) - \kappa(q^\lambda)}{\delta} \times \left[ \frac{C(z_* + \beta^\lambda(q^\lambda + \delta) - \kappa(q^\lambda + \delta)) - C(z_* + \beta^\lambda(q^\lambda) - \kappa(q^\lambda))}{(\beta^\lambda(q^\lambda + \delta) - \kappa(q^\lambda + \delta)) - (\beta^\lambda(q^\lambda) - \kappa(q^\lambda))} \right. \\ & \quad \left. - \frac{C(z_* - \kappa(q^\lambda + \delta)) - C(z_* - \kappa(q^\lambda))}{\kappa(q^\lambda) - \kappa(q^\lambda + \delta)} \right] \tag{A-18} \\ &= \frac{C(z_* + \beta^\lambda(q^\lambda + \delta) - \kappa(q^\lambda + \delta)) - C(z_* + \beta^\lambda(q^\lambda) - \kappa(q^\lambda))}{(\beta^\lambda(q^\lambda + \delta) - \kappa(q^\lambda + \delta)) - (\beta^\lambda(q^\lambda) - \kappa(q^\lambda))} \times \frac{\beta^\lambda(q^\lambda + \delta) - \beta^\lambda(q^\lambda)}{\delta}. \end{aligned}$$

Letting  $\delta$  go to zero, by the continuity of  $\beta^\lambda(\cdot)$  and  $\kappa(\cdot)$ , we know the right-hand side of (A-18) does converge to

$$C'(z_* + \beta^\lambda(q^\lambda) - \kappa(q^\lambda)) \times \frac{d\beta^\lambda(q^\lambda)}{dq^\lambda}.$$

Similarly, the second factor of the left-hand side of (A-18) does converge to

$$C'(z_* + \beta^\lambda(q^\lambda) - \kappa(q^\lambda)) - C'(z_* - \kappa(q^\lambda)).$$

By (46), the strictly convexity of  $C(\cdot)$  and the definition of  $z_*$  given by (36), we have that for  $q^\lambda > 0$ ,

$$C'(z_* + \beta^\lambda(q^\lambda) - \kappa(q^\lambda)) > 0 \text{ and } C'(z_* - \kappa(q^\lambda)) < 0.$$

Thus we know that the limit of the second factor of the left-hand side of (A-18) is positive. Hence we know the limit of the first factor of the left-hand side of (A-18) does exist, which gives the differentiability of  $\kappa(\cdot)$ . ■

*Proof:* [of Lemma 8] According to the definitions of  $\kappa(\tilde{q}_*^\lambda)$  and  $\bar{\kappa}(\tilde{q}_*^\lambda)$  given by (46), it suffices to show the first part of the lemma, namely,

$$\lim_{\lambda \rightarrow \infty} \tilde{q}_*^\lambda = \infty \text{ and } \lim_{\lambda \rightarrow \infty} \frac{\tilde{q}_*^\lambda}{\lambda} = 0. \tag{A-19}$$

If the first equation does not hold, then, by (46), the right-hand side of (65) will go to zero while the left-hand side is fixed at  $K > 0$ . And if the second equation does not hold, the right-hand

side of (65) will go to infinite while the left-hand side is fixed at  $K$ . And thus  $\tilde{q}_*^\lambda$  cannot be a solution of (65) when (A-19) does not hold. Thus we have (A-19). This in turn implies the lemma. ■

*Proof :* [of **Proposition 1**] First, assume  $K > 0$ . By Lemma 8 and the Taylor expansion, and recalling (36)-(37), we have

$$\begin{aligned}
& \int_{z_* - \kappa(\tilde{q}_*^\lambda)}^{z_* + \bar{\kappa}(\tilde{q}_*^\lambda)} C(y) dy \\
&= \int_{z_* - \kappa(\tilde{q}_*^\lambda)}^0 C(y) dy + \int_0^{z_* + \bar{\kappa}(\tilde{q}_*^\lambda)} C(y) dy \\
&= \int_{z_*}^0 C(y) dy + C_* \kappa(\tilde{q}_*^\lambda) - \frac{1}{2!} C'(z_*) (\kappa(\tilde{q}_*^\lambda))^2 + \frac{1}{3!} C''(z_*) (\kappa(\tilde{q}_*^\lambda))^3 + O\left(\left(\beta^\lambda(\tilde{q}_*^\lambda)\right)^4\right) \\
&\quad + \int_0^{z_*} C(y) dy + C_* \bar{\kappa}(\tilde{q}_*^\lambda) + \frac{1}{2!} C'(z_*) (\bar{\kappa}(\tilde{q}_*^\lambda))^2 + \frac{1}{3!} C''(z_*) (\bar{\kappa}(\tilde{q}_*^\lambda))^3 + O\left(\left(\beta^\lambda(\tilde{q}_*^\lambda)\right)^4\right) \\
&= C_* \beta^\lambda(\tilde{q}_*^\lambda) + \frac{C_*}{3!} (\beta^\lambda(\tilde{q}_*^\lambda))^3 (1 - 3\alpha(\tilde{q}_*^\lambda) + 3\alpha^2(\tilde{q}_*^\lambda)) + O\left(\left(\beta^\lambda(\tilde{q}_*^\lambda)\right)^4\right). \tag{A-20}
\end{aligned}$$

By again the Taylor expansion,

$$\begin{aligned}
C(z_* - \kappa(\tilde{q}_*^\lambda)) &= C_* - C'(z_*) \kappa(\tilde{q}_*^\lambda) + \frac{1}{2!} C''(z_*) (\kappa(\tilde{q}_*^\lambda))^2 + O\left(\left(\beta^\lambda(\tilde{q}_*^\lambda)\right)^3\right) \\
&= C_* + \frac{1}{2!} C_* \cdot (\kappa(\tilde{q}_*^\lambda))^2 + O\left(\left(\beta^\lambda(\tilde{q}_*^\lambda)\right)^3\right). \tag{A-21}
\end{aligned}$$

Note that

$$\frac{\nu q + 2\theta^2 \mathbf{E}[L_{(2)}]}{\sqrt{\nu q + \theta^2 \mathbf{E}[L_{(2)}]}} = \sqrt{\nu q + \theta^2 \mathbf{E}[L_{(2)}]} + \frac{\theta^2 \mathbf{E}[L_{(2)}]}{\sqrt{\nu q + \theta^2 \mathbf{E}[L_{(2)}]}}. \tag{A-22}$$

It follows from Lemma 8 and (65)-(A-22) that

$$\tilde{q}_*^\lambda = \left( \frac{2K}{C_* \sqrt{\nu}} \right)^{2/3} \cdot \lambda^{1/3} + o(\lambda^{1/3}), \tag{A-23}$$

which is (A.i) for  $K > 0$ .

Now we examine  $\tilde{r}_*^\lambda$ . By the Taylor expansion of both sides of (45) (expanding to the second moment), we have

$$\begin{aligned}
& C_* - C'(z_*) \kappa(\tilde{q}_*^\lambda) + \frac{1}{2} C''(z_*) (\kappa(\tilde{q}_*^\lambda))^2 \\
&= C_* + C'(z_*) \bar{\kappa}(\tilde{q}_*^\lambda) + \frac{1}{2} C''(z_*) (\bar{\kappa}(\tilde{q}_*^\lambda))^2 + O\left(\left(\beta^\lambda(\tilde{q}_*^\lambda)\right)^3\right).
\end{aligned}$$

Applying (36)-(37) yields  $(1/2)(1 - 2\alpha(\tilde{q}_*^\lambda)) \cdot C_* = O(\beta^\lambda(\tilde{q}_*^\lambda))$ . Because  $C_*$  is a positive constant, we know that

$$\alpha(\tilde{q}_*^\lambda) = \frac{1}{2} + O(\beta^\lambda(\tilde{q}_*^\lambda)). \quad (\text{A-24})$$

Thus, by (19), (44) and (46),

$$\tilde{r}_*^\lambda = \rho^\lambda + z_* \cdot \left( \frac{2K\nu}{C_*} \right)^{1/3} \cdot \lambda^{2/3} + o(\lambda^{2/3}). \quad (\text{A-25})$$

This is (A.ii) for  $K > 0$ .

For the optimal cost of System- $\tilde{\mathcal{S}}^\lambda$ , following (47), (A-20), and (A-23)-(A-25),

$$\begin{aligned} \widetilde{\mathcal{AC}}(\tilde{r}_*^\lambda, \tilde{q}_*^\lambda) &= \frac{\lambda K}{\tilde{q}_*^\lambda} + (\sigma^\lambda(\tilde{q}_*^\lambda))^2 \lambda \int_{z_* - \kappa(\tilde{q}_*^\lambda)}^{z_* + \bar{\kappa}(\tilde{q}_*^\lambda)} C(y) dy \\ &= \lambda K / \left[ \left( \frac{2K}{C_* \sqrt{\nu}} \right)^{2/3} \cdot \lambda^{1/3} + o(\lambda^{1/3}) \right] \\ &\quad + (\sigma^\lambda(\tilde{q}_*^\lambda))^2 \lambda \left[ C_* \beta^\lambda(\tilde{q}_*^\lambda) + \frac{C_*}{4!} (\beta^\lambda(\tilde{q}_*^\lambda))^3 + O((\beta^\lambda(\tilde{q}_*^\lambda))^4) \right] \\ &= 3 \left( \frac{K\nu C_*^2}{4} \right)^{1/3} \lambda^{2/3} + o(\lambda^{2/3}). \end{aligned} \quad (\text{A-26})$$

This is (A.iii) for  $K > 0$ .

When  $K = 0$ ,  $\tilde{q}_*^\lambda = 1$  is our assumption; (A.ii) and (A.iii) are given by (38). ■

*Proof :* [**of Proposition 2**] First by (47),

$$\min_{r^\lambda} \widetilde{\mathcal{AC}}(r^\lambda, \tilde{q}^\lambda) = \frac{\lambda K}{\tilde{q}^\lambda} + (\sigma^\lambda(\tilde{q}^\lambda))^2 \lambda \int_{z_* - \kappa(\tilde{q}^\lambda)}^{z_* + \bar{\kappa}(\tilde{q}^\lambda)} C(x) dx. \quad (\text{A-27})$$

If  $\overline{\lim}_{\lambda \rightarrow \infty} \tilde{q}^\lambda / \lambda > 0$ , then, by (46), we have

$$\overline{\lim}_{\lambda \rightarrow \infty} \int_{z_* - \kappa(\tilde{q}^\lambda)}^{z_* + \bar{\kappa}(\tilde{q}^\lambda)} C(x) dx > 0.$$

This together with (A-27) gives that

$$\overline{\lim}_{\lambda \rightarrow \infty} \frac{1}{\lambda} \left\{ \min_{r^\lambda} \widetilde{\mathcal{AC}}(r^\lambda, \tilde{q}^\lambda) \right\} > 0.$$

This, by Proposition 1, implies that

$$\lim_{\lambda \rightarrow \infty} \frac{\min_{r^\lambda} \widetilde{\mathcal{AC}}(r^\lambda, \tilde{q}^\lambda)}{\widetilde{\mathcal{AC}}(\tilde{r}_*^\lambda, \tilde{q}_*^\lambda)} = \infty.$$

Hence, to prove the proposition, it suffices to consider  $\overline{\lim}_{\lambda \rightarrow \infty} \tilde{q}^\lambda / \lambda = 0$ . Under this condition, by the Taylor expansion given by (A-20),

$$\int_{z_* - \kappa(\tilde{q}^\lambda)}^{z_* + \bar{\kappa}(\tilde{q}^\lambda)} C(x) dx = C_* \beta^\lambda(\tilde{q}^\lambda) + \frac{C_*}{3!} (\beta^\lambda(\tilde{q}^\lambda))^3 (1 - 3\alpha(\tilde{q}^\lambda) + 3\alpha^2(\tilde{q}^\lambda)) + O\left((\beta^\lambda(\tilde{q}^\lambda))^4\right).$$

Hence,

$$\begin{aligned} & \frac{\lambda K}{\tilde{q}^\lambda} + (\sigma^\lambda(\tilde{q}^\lambda))^2 \lambda \int_{z_* - \kappa(\tilde{q}^\lambda)}^{z_* + \bar{\kappa}(\tilde{q}^\lambda)} C(x) dx \\ &= \frac{\lambda K}{\Delta(\lambda) \tilde{q}_*^\lambda} + (\sigma^\lambda(\tilde{q}^\lambda))^2 \lambda \left[ C_* \beta^\lambda(\tilde{q}^\lambda) + \frac{C_*}{3!} (\beta^\lambda(\tilde{q}^\lambda))^3 (1 - 3\alpha(\tilde{q}^\lambda) + 3\alpha^2(\tilde{q}^\lambda)) \right. \\ & \quad \left. + O\left((\beta^\lambda(\tilde{q}^\lambda))^4\right) \right] \\ &= \left[ \left( \frac{K \nu C_*^2}{4} \right)^{1/3} \cdot \frac{1}{\Delta(\lambda)} + \left( 2K \nu C_*^2 \right)^{1/3} \sqrt{\Delta(\lambda)} \right] \cdot \lambda^{2/3} + o(\lambda^{2/3}). \end{aligned} \quad (\text{A-28})$$

Let

$$U(x) = \left[ \left( \frac{K \nu C_*^2}{4} \right)^{1/3} \cdot \frac{1}{x} + \left( 2K \nu C_*^2 \right)^{1/3} \sqrt{x} \right]$$

It is direct to verify that  $-U(x)$  is unimodal, and  $\arg \min_x U(x) = 1$ . Therefore, (A-28) implies part (i) of the proposition.

Next, consider part (ii). Note, by (38), that

$$\widetilde{\mathcal{A}C}(\tilde{r}^\lambda, \tilde{q}^\lambda) = \frac{\lambda K}{\tilde{q}^\lambda} + (\sigma^\lambda(\tilde{q}^\lambda))^2 \lambda \int_{z^\lambda(\tilde{r}^\lambda, \tilde{q}^\lambda)}^{z^\lambda(\tilde{r}^\lambda, \tilde{q}^\lambda) + \beta^\lambda(\tilde{q}^\lambda)} C(y) dy. \quad (\text{A-29})$$

If  $\overline{\lim}_{\lambda \rightarrow \infty} z^\lambda(\tilde{r}^\lambda, \tilde{q}^\lambda) \neq z_*$  or  $\underline{\lim}_{\lambda \rightarrow \infty} z^\lambda(\tilde{r}^\lambda, \tilde{q}^\lambda) \neq z_*$ , then there exists a subsequence, again writing as  $\lambda$ , such that

$$\lim_{\lambda \rightarrow \infty} z^\lambda(\tilde{r}^\lambda, \tilde{q}^\lambda) = b \neq z_*. \quad (\text{A-30})$$

Now making the Taylor expansion (expanding to the second moment) for the last term in (A-29), we obtain

$$(\sigma^\lambda(\tilde{q}^\lambda))^2 \lambda \int_{z^\lambda(\tilde{r}^\lambda, \tilde{q}^\lambda)}^{z^\lambda(\tilde{r}^\lambda, \tilde{q}^\lambda) + \beta^\lambda(\tilde{q}^\lambda)} C(y) dy = \sigma^\lambda(\tilde{q}^\lambda) \cdot C(z^\lambda(\tilde{r}^\lambda, \tilde{q}^\lambda)) \sqrt{\lambda \tilde{q}^\lambda} + o(\lambda^{2/3}). \quad (\text{A-31})$$

By the definition of  $z_*$  and (A-30), we know that  $\lim_{\lambda \rightarrow \infty} C(z^\lambda(\tilde{r}^\lambda, \tilde{q}^\lambda)) = C(b) > C(z_*)$ . This together with (A-29) and (A-31) yields part (ii). ■

*Proof :* [**of Proposition 3**] Suppose contrariwise that the proposition is not true. Then there exists a subsequence  $\{\lambda_k : k \geq 1\}$  such that

$$\lim_{k \rightarrow \infty} q_*^{\lambda_k} < \infty \quad \text{or} \quad \lim_{k \rightarrow \infty} \frac{q_*^{\lambda_k}}{\lambda_k} > 0. \quad (\text{A-32})$$

To simplify notation, we write the sequence as  $\lambda$  (In the remainder of the paper, for the same reason, the subsequences will be always written as  $\lambda$ ). By Lemma 1, we know that given  $q^\lambda$ ,  $q^\lambda \parallel (J^\lambda + q^\lambda \cdot N^\lambda)$  is uniformly distributed on  $\mathcal{Q}$ . Here, again, “ $\parallel$ ” is the modulo operator. Now let

$$\begin{aligned} \Delta_1^\lambda &= \left\{0, \dots, \lfloor \frac{q_*^\lambda}{4} \rfloor - 1\right\}, & \Delta_2^\lambda &= \left\{\lfloor \frac{q_*^\lambda}{4} \rfloor, \dots, 2\lfloor \frac{q_*^\lambda}{4} \rfloor - 1\right\}, \\ \Delta_3^\lambda &= \left\{2\lfloor \frac{q_*^\lambda}{4} \rfloor, \dots, 3\lfloor \frac{q_*^\lambda}{4} \rfloor - 1\right\}, & \Delta_4^\lambda &= \left\{3\lfloor \frac{q_*^\lambda}{4} \rfloor, \dots, q_*^\lambda - 1\right\}. \end{aligned}$$

When  $(q_*^\lambda \parallel r_*^\lambda) \in \Delta_1^\lambda$ , we have

$$\left| r_*^\lambda + q_*^\lambda - J^\lambda - q_*^\lambda \cdot N^\lambda \right| \times I\{J^\lambda \in \Delta_3^\lambda\} \geq \lfloor \frac{q_*^\lambda}{4} \rfloor - 1.$$

Hence, if  $(q_*^\lambda \parallel r_*^\lambda) \in \Delta_1^\lambda$  and the second inequality in (A-32) holds, then

$$\begin{aligned} \overline{\lim}_{\lambda \rightarrow \infty} \frac{\mathcal{AC}(r_*^\lambda, q_*^\lambda)}{\lambda} &\geq \overline{\lim}_{\lambda \rightarrow \infty} \frac{1}{\lambda} \mathbb{E} \left[ \hat{G}(r_*^\lambda + q_*^\lambda - J^\lambda - q_*^\lambda \cdot N^\lambda) \right] \quad (\text{by (14)}) \\ &\geq \overline{\lim}_{\lambda \rightarrow \infty} \frac{1}{\lambda} \mathbb{E} \left[ \hat{G}(r_*^\lambda + q_*^\lambda - J^\lambda - q_*^\lambda \cdot N^\lambda) \times I\{J^\lambda \in \Delta_3^\lambda\} \right] \\ &\geq \overline{\lim}_{\lambda \rightarrow \infty} \frac{1}{\lambda} \mathbb{E} \left[ \min\{p, h\} \times \left( \lfloor \frac{q_*^\lambda}{4} \rfloor - 1 \right) \times I\{J^\lambda \in \Delta_3^\lambda\} \right] \\ &\geq \lim_{\lambda \rightarrow \infty} \frac{\min\{p, h\}}{\lambda} \times \frac{1}{4} \times \left( \lfloor \frac{q_*^\lambda}{4} \rfloor - 1 \right) \\ &> 0. \end{aligned} \quad (\text{A-33})$$

Similarly, we can show that for  $(q_*^\lambda \parallel r_*^\lambda) \in \Delta_i^\lambda$  ( $i = 2, 3, 4$ ), (A-33) still holds if the second inequality in (A-32) holds.

If the first inequality in (A-32) holds, then by  $\mathbb{E}[\hat{G}(IN)] \geq 0$  and (14),

$$\overline{\lim}_{\lambda \rightarrow \infty} \frac{\mathcal{AC}(r_*^\lambda, q_*^\lambda)}{\lambda} \geq \overline{\lim}_{\lambda \rightarrow \infty} \frac{K}{q_*^\lambda} > 0. \quad (\text{A-34})$$

By the definition of  $z^\lambda(i, q^\lambda)$  (see (19)), for  $i = \lfloor \rho^\lambda \rfloor + 1, \dots, \lfloor \rho^\lambda \rfloor + \lfloor \sqrt{\lambda} \rfloor$ ,  $\lim_{\lambda \rightarrow \infty} z^\lambda(i, \lfloor \sqrt{\lambda} \rfloor) = 0$ .

So when policy  $(r^\lambda, q^\lambda) = (\lfloor \rho^\lambda \rfloor, \lfloor \sqrt{\lambda} \rfloor)$  is implemented, by (14) and (39)-(41), we have

$$\begin{aligned} \lim_{\lambda \rightarrow \infty} \frac{\mathcal{AC}(\lfloor \rho^\lambda \rfloor, \lfloor \sqrt{\lambda} \rfloor)}{\lambda} &= \lim_{\lambda \rightarrow \infty} \frac{1}{\lambda} \left\{ \frac{\lambda K}{\lfloor \sqrt{\lambda} \rfloor} + \frac{\sigma^\lambda(\lfloor \sqrt{\lambda} \rfloor) \sqrt{\lambda \lfloor \sqrt{\lambda} \rfloor}}{\lfloor \sqrt{\lambda} \rfloor} \sum_{i=\lfloor \rho^\lambda \rfloor + 1}^{\lfloor \rho^\lambda \rfloor + \lfloor \sqrt{\lambda} \rfloor} C(z^\lambda(i, \lfloor \sqrt{\lambda} \rfloor)) \right\} \\ &\leq \lim_{\lambda \rightarrow \infty} \frac{\sigma^\lambda(\lfloor \sqrt{\lambda} \rfloor) \lfloor \sqrt{\lambda} \rfloor}{\sqrt{\lambda \lfloor \sqrt{\lambda} \rfloor}} \cdot \max_{\lfloor \rho^\lambda \rfloor + 1 \leq i \leq \lfloor \rho^\lambda \rfloor + \lfloor \sqrt{\lambda} \rfloor} C(z^\lambda(i, \lfloor \sqrt{\lambda} \rfloor)) \\ &= 0. \end{aligned}$$

So in view of (A-33)-(A-34), when (A-32) holds,

$$\lim_{\lambda \rightarrow \infty} \frac{\mathcal{AC}(r_*^\lambda, q_*^\lambda)}{\mathcal{AC}(\lfloor \rho^\lambda \rfloor, \lfloor \sqrt{\lambda} \rfloor)} = \infty,$$

which implies that  $(r_*^\lambda, q_*^\lambda)$  cannot be optimal, a contradiction. Thus, the proposition holds. ■

*Proof:* [of Proposition 4] According to the definition of Condition 2, it is sufficient to show

$$\left| \lim_{\lambda \rightarrow \infty} z^\lambda(r_*^\lambda, q_*^\lambda) \right| < \infty. \quad (\text{A-35})$$

To that end, we first show that

$$\left| \overline{\lim}_{\lambda \rightarrow \infty} z^\lambda(r_*^\lambda, q_*^\lambda) \right| < \infty. \quad (\text{A-36})$$

Suppose contrariwise that this does not hold. Then we have two possible cases:

$$\text{Case A: } \underline{\lim}_{\lambda \rightarrow \infty} z^\lambda(r_*^\lambda, q_*^\lambda) = -\infty; \quad \text{Case B: } \overline{\lim}_{\lambda \rightarrow \infty} z^\lambda(r_*^\lambda, q_*^\lambda) = +\infty. \quad (\text{A-37})$$

First, consider Case A. In view of Proposition 3, we have that if  $K > 0$ ,

$$\underline{\lim}_{\lambda \rightarrow \infty} z^\lambda(i, q_*^\lambda) = -\infty \text{ for } i = r_*^\lambda + 1, \dots, r_*^\lambda + q_*^\lambda. \quad (\text{A-38})$$

If  $K = 0$ , by  $q_*^\lambda = 1$ , (A-38) also holds under Case A. Then there exists a subsequence  $\{\lambda_k : k \geq 1\}$  such that  $\lim_{k \rightarrow \infty} z^{\lambda_k}(i, q_*^{\lambda_k}) = -\infty$ . We still write this subsequence as  $\lambda$ . By (39)-(40), for any policy  $(r^\lambda, q^\lambda)$ ,

$$\begin{aligned} \mathbb{E} \left[ \hat{G}(IN^\lambda) \right] &= \sum_{i=r^\lambda+1}^{r^\lambda+q^\lambda} \mathbb{E} \left[ I \{ J^\lambda = r^\lambda + q^\lambda - i \} \times \gamma^\lambda(q^\lambda) \times \hat{G}(z^\lambda(i, q^\lambda) - Y^\lambda(q^\lambda)) \right] \\ &= \gamma^\lambda(q^\lambda) \sum_{i=r^\lambda+1}^{r^\lambda+q^\lambda} \mathbb{E} \left[ I \{ J^\lambda = r^\lambda + q^\lambda - i \} \hat{G}(z^\lambda(i, q^\lambda) - Y^\lambda(q^\lambda)) \right]. \end{aligned} \quad (\text{A-39})$$

We first consider each summand. Note that

$$\begin{aligned} &\mathbb{E} \left[ I \{ J^\lambda = r^\lambda + q^\lambda - i \} \times \hat{G}(z^\lambda(i, q^\lambda) - Y^\lambda(q^\lambda)) \right] \\ &= \int_{-\infty}^{\infty} \hat{G}(z^\lambda(i, q^\lambda) - y) \, d\Pr(Y^\lambda(q^\lambda) \leq y, J^\lambda = r^\lambda + q^\lambda - i). \end{aligned} \quad (\text{A-40})$$

By the first part of Theorem 1 and Theorem 1.A.3 (a) in Shaked and Shanthikumar (2007), we know that

$$\begin{aligned} & \int_{-\infty}^{\infty} p \cdot (z^\lambda(i, q^\lambda) - y)^- \, d\Pr\left(Y^\lambda(q^\lambda) \leq y, J^\lambda = r^\lambda + q^\lambda - i\right) \\ & \geq \frac{1}{q^\lambda} \int_{-\infty}^{\infty} p \cdot (z^\lambda(i, q^\lambda) - y)^- \, d\Pr\left(Y^\lambda(q^\lambda) - \beta^\lambda(q^\lambda) \leq y\right), \end{aligned} \quad (\text{A-41})$$

$$\begin{aligned} & \int_{-\infty}^{\infty} h \cdot (z^\lambda(i, q^\lambda) - y)^+ \, d\Pr\left(Y^\lambda(q^\lambda) \leq y, J^\lambda = r^\lambda + q^\lambda - i\right) \\ & \geq \frac{1}{q^\lambda} \int_{-\infty}^{\infty} h \cdot (z^\lambda(i, q^\lambda) - y)^+ \, d\Pr\left(Y^\lambda(q^\lambda) + \beta^\lambda(q^\lambda) \leq y\right). \end{aligned} \quad (\text{A-42})$$

Combining (A-41)-(A-42) yields

$$\begin{aligned} & \int_{-\infty}^{\infty} \hat{G}(z^\lambda(i, q^\lambda) - y) \, d\Pr\left(Y^\lambda(q^\lambda) \leq y, J^\lambda = r^\lambda + q^\lambda - i\right) \\ & \geq \frac{1}{q^\lambda} \mathbf{E} \left[ h \cdot \left( z^\lambda(i, q^\lambda) - \beta^\lambda(q^\lambda) - Y^\lambda(q^\lambda) \right)^+ + p \cdot \left( Y^\lambda(q^\lambda) - \beta^\lambda(q^\lambda) - z^\lambda(i, q^\lambda) \right)^+ \right]. \end{aligned} \quad (\text{A-43})$$

Considering policy  $(r_*^\lambda, q_*^\lambda)$ , we have, by Proposition 3, that for  $i = r_*^\lambda + 1, \dots, r_*^\lambda + q_*^\lambda$ ,

$$\begin{aligned} & \lim_{\lambda \rightarrow \infty} \mathbf{E} \left[ h \cdot \left( z^\lambda(i, q_*^\lambda) - \beta^\lambda(q_*^\lambda) - Y^\lambda(q_*^\lambda) \right)^+ + p \cdot \left( Y^\lambda(q_*^\lambda) - \beta^\lambda(q_*^\lambda) - z^\lambda(i, q_*^\lambda) \right)^+ \right] \\ & \geq \lim_{\lambda \rightarrow \infty} \mathbf{E} \left[ p \cdot \left( Y^\lambda(q_*^\lambda) - \beta^\lambda(q_*^\lambda) - z^\lambda(i, q_*^\lambda) \right)^+ \right] \\ & \geq \lim_{\lambda \rightarrow \infty} \mathbf{E} \left[ p \cdot \left( -\beta^\lambda(q_*^\lambda) - z^\lambda(i, q_*^\lambda) \right)^+ \times I \left\{ Y^\lambda(q_*^\lambda) \leq 0 \right\} \right] \\ & = \frac{p}{2} \times \lim_{\lambda \rightarrow \infty} \left( -\beta^\lambda(q_*^\lambda) - z^\lambda(i, q_*^\lambda) \right)^+ \quad (\text{by Lemma 2}) \\ & = \infty. \quad (\text{by (A-38)}) \end{aligned}$$

It follows from (A-43) that for policy  $(r_*^\lambda, q_*^\lambda)$ ,

$$\sum_{i=r_*^\lambda+1}^{r_*^\lambda+q_*^\lambda} \mathbf{E} \left[ I \left\{ J^\lambda = r_*^\lambda + q_*^\lambda - i \right\} \hat{G}(z^\lambda(i, q_*^\lambda) - Y^\lambda(q_*^\lambda)) \right] \rightarrow \infty \quad \text{as } \lambda \rightarrow \infty. \quad (\text{A-44})$$

On the other hand, consider another policy  $(r_0^\lambda, q_*^\lambda)$  with  $r_0^\lambda = \lfloor \rho^\lambda + \gamma^\lambda(q_*^\lambda) \rfloor$ . It is direct to verify that the sequence of  $(r_0^\lambda, q_*^\lambda)$ -policies satisfies Condition 2. Furthermore, by Proposition 3, the sequence of ordering quantities  $\{q_*^\lambda\}$  satisfies Condition 1. Similar to the proof of (41) in Lemma 3, we can, by Conditions 1–2, show that for  $i = r_0^\lambda + 1, \dots, r_0^\lambda + q_*^\lambda$ ,

$$\begin{aligned} & \lim_{\lambda \rightarrow \infty} \mathbf{E} \left[ h \cdot \left( z^\lambda(i, q_*^\lambda) + \beta^\lambda(q_*^\lambda) - Y^\lambda(q_*^\lambda) \right)^+ + p \cdot \left( Y^\lambda(q_*^\lambda) + \beta^\lambda(q_*^\lambda) - z^\lambda(i, q_*^\lambda) \right)^+ \right] \\ & = \lim_{\lambda \rightarrow \infty} \mathbf{E} \left[ h \cdot \left( z^\lambda(i, q_*^\lambda) - \beta^\lambda(q_*^\lambda) - Y^\lambda(q_*^\lambda) \right)^+ + p \cdot \left( Y^\lambda(q_*^\lambda) - \beta^\lambda(q_*^\lambda) - z^\lambda(i, q_*^\lambda) \right)^+ \right] \\ & = \lim_{\lambda \rightarrow \infty} C(z^\lambda(i, q_*^\lambda)). \end{aligned} \quad (\text{A-45})$$

Combining (A-40)-(A-45) yields that for  $i = r_0^\lambda + 1, \dots, r_0^\lambda + q_*^\lambda$ ,

$$\lim_{\lambda \rightarrow \infty} q_*^\lambda \cdot \mathbb{E} \left[ I \left\{ J^\lambda = r^\lambda + q_*^\lambda - i \right\} \times \hat{G} \left( z^\lambda(i, q_*^\lambda) - Y^\lambda(q_*^\lambda) \right) \right] = \lim_{\lambda \rightarrow \infty} C \left( z^\lambda(i, q_*^\lambda) \right) < \infty. \quad (\text{A-46})$$

Thus, from (A-44) and (A-46),

$$\frac{\sum_{i=r_*^\lambda+1}^{r_*^\lambda+q_*^\lambda} \mathbb{E} \left[ I \left\{ J^\lambda = r_*^\lambda + q_*^\lambda - i \right\} \hat{G} \left( z^\lambda(i, q_*^\lambda) - Y^\lambda(q_*^\lambda) \right) \right]}{\sum_{i=r_0^\lambda+1}^{r_0^\lambda+q_*^\lambda} \mathbb{E} \left[ I \left\{ J^\lambda = r_0^\lambda + q_*^\lambda - i \right\} \hat{G} \left( z^\lambda(i, q_*^\lambda) - Y^\lambda(q_*^\lambda) \right) \right]} \rightarrow \infty \quad \text{as } \lambda \rightarrow \infty.$$

which, by (14) and (39), contradicts the optimality of  $(r_*^\lambda, q_*^\lambda)$ . Therefore, Case A does not hold. Similarly, we can show Case B does not hold also. Hence (A-36) is proved.

To prove (A-35), with the help of (A-36), it is sufficient to show that for any convergent subsequence of  $z^\lambda(r_*^\lambda, q_*^\lambda)$  (for the sake of notation simplicity, we still write it as  $z^\lambda(r_*^\lambda, q_*^\lambda)$ ), its limit is always  $z_*$ . That is, we only need to prove

$$\lim_{\lambda \rightarrow \infty} z^\lambda(r_*^\lambda, q_*^\lambda) = z_*. \quad (\text{A-47})$$

The convergence of the subsequence of  $z^\lambda(r_*^\lambda, q_*^\lambda)$  implies that its corresponding subsequence of  $(r_*^\lambda, q_*^\lambda)$  satisfies Condition 2. In view of Proposition 3, we know that  $(r_*^\lambda, q_*^\lambda)$  satisfies Conditions 1–2 in Lemma 4. Thus, by Lemma 4,

$$\lim_{\lambda \rightarrow \infty} \frac{\mathcal{AC}(r_*^\lambda, q_*^\lambda)}{\widetilde{\mathcal{AC}}(r_*^\lambda, q_*^\lambda)} = 1. \quad (\text{A-48})$$

Using Proposition 1, we know that the sequence of  $(\tilde{r}_*^\lambda, \tilde{q}_*^\lambda)$ -policies satisfies Conditions 1–2 with  $\lim_{\lambda \rightarrow \infty} \tilde{q}_*^\lambda = \infty$ . It follows from Lemma 4 that

$$\lim_{\lambda \rightarrow \infty} \frac{\mathcal{AC}(\tilde{r}_*^\lambda, \tilde{q}_*^\lambda)}{\widetilde{\mathcal{AC}}(\tilde{r}_*^\lambda, \tilde{q}_*^\lambda)} = 1. \quad (\text{A-49})$$

On the other hand, by the optimality of  $(r_*^\lambda, q_*^\lambda)$  for System- $\mathcal{S}^\lambda$  and the optimality  $(\tilde{r}_*^\lambda, \tilde{q}_*^\lambda)$  for System- $\widetilde{\mathcal{S}}^\lambda$ , we have  $\mathcal{AC}(r_*^\lambda, q_*^\lambda) \leq \mathcal{AC}(\tilde{r}_*^\lambda, \tilde{q}_*^\lambda)$  and  $\widetilde{\mathcal{AC}}(r_*^\lambda, q_*^\lambda) \geq \widetilde{\mathcal{AC}}(\tilde{r}_*^\lambda, \tilde{q}_*^\lambda)$ . Hence from (A-48) and (A-49),

$$\lim_{\lambda \rightarrow \infty} \frac{\widetilde{\mathcal{AC}}(r_*^\lambda, q_*^\lambda)}{\mathcal{AC}(\tilde{r}_*^\lambda, \tilde{q}_*^\lambda)} = 1. \quad (\text{A-50})$$

With the help of Proposition 2, we, by (A-50), know that  $\lim_{\lambda \rightarrow \infty} z^\lambda(r_*^\lambda, q_*^\lambda) = z_*$ , which proves (A-47). This implies (A-35). The second part of the proposition ((62) and (63)) directly follows from (A-48) and (A-50). ■

*Proof:* [of Proposition 5] First we consider  $K > 0$  case. Similar to the proof of Proposition 1, we need to establish the result similar to Lemma 8. Namely,

$$\lim_{\lambda \rightarrow \infty} \tilde{q}_{*c}^\lambda = \infty \quad \text{and} \quad \frac{\tilde{q}_{*c}^\lambda}{\sqrt{\lambda}} \text{ is bounded.} \quad (\text{A-51})$$

If the first equation is not true, then there exists a subsequence  $\{\lambda_k : k \geq 1\}$  such that

$$\lim_{k \rightarrow \infty} \lambda_k = \infty \quad \text{and} \quad \lim_{k \rightarrow \infty} \tilde{q}_{*c}^{\lambda_k} = a < \infty. \quad (\text{A-52})$$

We still label the subsequence of (A-52) by  $\lambda$ . Under (A-52), by the definition of  $\gamma_c^\lambda$  given by (48), we have

$$\kappa_c(\tilde{q}_{*c}^\lambda) \rightarrow 0 \quad \text{and} \quad \bar{\kappa}_c(\tilde{q}_{*c}^\lambda) \rightarrow 0, \quad (\text{A-53})$$

which implies

$$\lim_{\lambda \rightarrow \infty} C(z_* - \kappa_c(\tilde{q}_{*c}^\lambda)) = C_*. \quad (\text{A-54})$$

This plus the mean-value theorem for integration yields

$$\frac{\gamma_c^\lambda}{\tilde{q}_{*c}^\lambda} \int_{z_* - \kappa_c(\tilde{q}_{*c}^\lambda)}^{z_* + \bar{\kappa}_c(\tilde{q}_{*c}^\lambda)} C(x) dx \rightarrow C_*. \quad (\text{A-55})$$

Combining (A-54)–(A-55) yields that the right-hand-side of (57) converges to zero. However, (A-52) implies that  $\frac{\lambda K}{\gamma_c^\lambda \tilde{q}_{*c}^\lambda} \rightarrow \infty$ . This produces a contradiction to (57). Therefore, we have the first equation of (A-51).

Next we show the second equation of (A-51). Suppose contrariwise that there exists a sequence of  $\{\lambda_k, k \geq 1\}$  such that

$$\lim_{k \rightarrow \infty} \frac{\tilde{q}_{*c}^{\lambda_k}}{\sqrt{\lambda_k}} = \infty. \quad (\text{A-56})$$

Again, for simpler notation, we label the sequence by  $\lambda$ . From (55) and the strict convexity of  $C(\cdot)$ , in view of (A-56), we know that

$$\lim_{\lambda \rightarrow \infty} \frac{\alpha_c(\tilde{q}_{*c}^\lambda) \cdot \tilde{q}_{*c}^\lambda}{\sqrt{\lambda}} = \infty, \quad \lim_{\lambda \rightarrow \infty} \frac{[1 - \alpha_c(\tilde{q}_{*c}^\lambda)] \cdot \tilde{q}_{*c}^\lambda}{\sqrt{\lambda}} = \infty. \quad (\text{A-57})$$

It follows from (A-57) and the strict convexity of  $C(\cdot)$  that

$$\begin{aligned} & C(z_* - \kappa_c(\tilde{q}_{*c}^\lambda)) - \frac{\gamma_c^\lambda}{\tilde{q}_{*c}^\lambda} \int_{z_* - \kappa_c(\tilde{q}_{*c}^\lambda)}^{z_* + \bar{\kappa}_c(\tilde{q}_{*c}^\lambda)} C(x) dx \\ &= \lim_{\lambda \rightarrow \infty} \frac{\gamma_c^\lambda}{\tilde{q}_{*c}^\lambda} \int_{z_* - \kappa_c(\tilde{q}_{*c}^\lambda)}^{z_* + \bar{\kappa}_c(\tilde{q}_{*c}^\lambda)} \left( C(z_* - \kappa_c(\tilde{q}_{*c}^\lambda)) - C(x) \right) dx \\ &> 0. \end{aligned}$$

But, from (A-56),  $\lim_{\lambda \rightarrow \infty} \lambda K / (\gamma_c^\lambda \tilde{q}_{*c}^\lambda) = 0$ . Thus, we reach a contradiction to (57). In other words, (A-56) cannot hold, and we must have the second equation of (A-51).

As  $\{\alpha_c(\tilde{q}_{*c}^\lambda) : \lambda > 0\}$  is also bounded, in view of (A-51), we pick up any two convergence sequences, say  $\{\frac{\tilde{q}_{*c}^{\lambda_k}}{\sqrt{\lambda_k}} : k \geq 1\}$  and  $\{\alpha_c(\tilde{q}_{*c}^{\lambda_k}) : k \geq 1\}$ , from  $\{\frac{\tilde{q}_{*c}^\lambda}{\sqrt{\lambda}} : \lambda > 0\}$  and  $\{\alpha_c(\tilde{q}_{*c}^\lambda) : \lambda > 0\}$  (again, write them as  $\lambda$  sequences). Let

$$\lim_{k \rightarrow \infty} \frac{\tilde{q}_{*c}^{\lambda_k}}{\sqrt{\lambda_k}} = \bar{\tau} \quad \text{and} \quad \lim_{k \rightarrow \infty} \alpha_c(\tilde{q}_{*c}^{\lambda_k}) = \bar{\alpha}. \quad (\text{A-58})$$

These imply

$$\lim_{\lambda \rightarrow \infty} (\kappa_c(\tilde{q}_{*c}^\lambda) - \alpha\tau\eta) = \lim_{\lambda \rightarrow \infty} (\bar{\kappa}_c(\tilde{q}_{*c}^\lambda) - (1 - \alpha)\tau\eta) = 0.$$

We have, by (55), that

$$\lim_{\lambda \rightarrow \infty} \frac{\gamma_c^\lambda}{\tilde{q}_{*c}^\lambda} \int_{z_* - \kappa_c(\tilde{q}_{*c}^\lambda)}^{z_* + \bar{\kappa}_c(\tilde{q}_{*c}^\lambda)} C(x) dx = \frac{1}{\bar{\tau}\eta} \int_{z_* - \bar{\alpha}\tau\eta}^{z_* + (1 - \bar{\alpha})\bar{\tau}\eta} C(y) dy, \quad (\text{A-59})$$

$$\lim_{\lambda \rightarrow \infty} \frac{\lambda K}{\gamma_c^\lambda \tilde{q}_{*c}^\lambda} = \frac{K\eta}{\bar{\tau}}, \quad (\text{A-60})$$

$$C(z_* - \bar{\alpha}\tau\eta) = C(z_* + (1 - \bar{\alpha})\bar{\tau}\eta). \quad (\text{A-61})$$

It follows from (57), (A-59)-(A-60) that

$$\frac{K\eta}{\bar{\tau}} = C(z_* - \bar{\alpha}\tau\eta) - \frac{1}{\bar{\tau}\eta} \int_{z_* - \bar{\alpha}\tau\eta}^{z_* + (1 - \bar{\alpha})\bar{\tau}\eta} C(y) dy. \quad (\text{A-62})$$

Thus the limits of any convergence sequences of  $\{\frac{\tilde{q}_{*c}^\lambda}{\sqrt{\lambda}}\}$  and  $\{\alpha(\tilde{q}_{*c}^\lambda)\}$  satisfy (A-61)-(A-62). By Lemma 6, we proved (B.i) and (B.ii) for  $(\tilde{r}_{*c}^\lambda, \tilde{q}_{*c}^\lambda)$  of system- $\tilde{\mathcal{S}}_c^\lambda$ .

Now consider (B.iii) for  $\widetilde{\mathcal{A}C}_c(\tilde{r}_{*c}^\lambda, \tilde{q}_{*c}^\lambda)$ . Similar to (A-20), using the Taylor expansion, we get

$$\begin{aligned} \int_{z_* - \kappa_c(\tilde{q}_{*c}^\lambda)}^{z_* + \bar{\kappa}_c(\tilde{q}_{*c}^\lambda)} C(y) dy &= \int_{z_* - \kappa_c(\tilde{q}_{*c}^\lambda)}^0 C(y) dy + \int_0^{z_* + \bar{\kappa}_c(\tilde{q}_{*c}^\lambda)} C(y) dy \\ &= \int_{z_* - \alpha\tau\eta}^0 C(y) dy + C(z_* - \alpha\tau\eta) \times (\kappa_c(\tilde{q}_{*c}^\lambda) - \alpha\tau\eta) + \int_0^{z_* + (1 - \alpha)\tau\eta} C(y) dy \\ &\quad + C(z_* + (1 - \alpha)\tau\eta) \times (\bar{\kappa}_c(\tilde{q}_{*c}^\lambda) - (1 - \alpha)\tau\eta) + o(1). \end{aligned} \quad (\text{A-63})$$

This, by the first part of the proposition and (A-63), implies that

$$\begin{aligned} \widetilde{\mathcal{A}C}_c(\tilde{r}_{*c}^\lambda, \tilde{q}_{*c}^\lambda) &= \frac{\lambda K}{\tilde{q}_{*c}^\lambda} + \gamma_c^\lambda \cdot \frac{\gamma_c^\lambda}{\tilde{q}_{*c}^\lambda} \int_{z_* - \kappa_c(\tilde{q}_{*c}^\lambda)}^{z_* + \bar{\kappa}_c(\tilde{q}_{*c}^\lambda)} C(y) dy \\ &= \left( \frac{K}{\tau} + \frac{1}{\tau\eta^2} \int_{z_* - \alpha\tau\eta}^{z_* + (1 - \alpha)\tau\eta} C(y) dy \right) \sqrt{\lambda} + o(\sqrt{\lambda}). \end{aligned} \quad (\text{A-64})$$

Therefore, (B.iii) for  $\widetilde{\mathcal{A}C}_c(\tilde{r}_{*c}^\lambda, \tilde{q}_{*c}^\lambda)$  is proved.

Now consider  $K = 0$ .  $\tilde{q}_{*c}^\lambda = 1$  directly follows from (51) and convexity of  $C(\cdot)$ . (B.ii) and (B.iii) are given by (48) and (51). ■

*Proof:* [of **Proposition 6**] We first prove (i). Suppose that

$$\overline{\lim}_{\lambda \rightarrow \infty} \Delta_c(\lambda) = \infty. \quad (\text{A-65})$$

Then, by (51),

$$\begin{aligned} \lim_{\lambda \rightarrow \infty} \frac{\min_{r^\lambda} \widetilde{\mathcal{A}C}_c(r^\lambda, \tilde{q}^\lambda)}{\sqrt{\lambda}} &= \lim_{\lambda \rightarrow \infty} \frac{\gamma_c^\lambda}{\tilde{q}^\lambda \sqrt{\lambda}} \int_{\tilde{r}_{*c}^\lambda(\tilde{q}^\lambda)}^{\tilde{r}_{*c}^\lambda(\tilde{q}^\lambda) + \tilde{q}^\lambda} C(z_c^\lambda(y)) \, dy \\ &= \frac{(\gamma_c^\lambda)^2}{\sqrt{\lambda} \tilde{q}^\lambda} \int_{z_c^\lambda(\tilde{r}_{*c}^\lambda(\tilde{q}^\lambda))}^{z_c^\lambda(\tilde{r}_{*c}^\lambda(\tilde{q}^\lambda) + \beta_c^\lambda(\tilde{q}^\lambda))} C(y) \, dy. \end{aligned} \quad (\text{A-66})$$

Applying L'Hôpital's rule, we have

$$\lim_{\lambda \rightarrow \infty} \int_{z_c^\lambda(\tilde{r}_{*c}^\lambda(\tilde{q}^\lambda))}^{z_c^\lambda(\tilde{r}_{*c}^\lambda(\tilde{q}^\lambda) + \beta_c^\lambda(\tilde{q}^\lambda))} C(y) \, dy \Big/ \frac{\tilde{q}^\lambda}{\sqrt{\lambda}} = \infty. \quad (\text{A-67})$$

Hence, by (A-66)-(A-67) and Proposition 5, we have that

$$\overline{\lim}_{\lambda \rightarrow \infty} \frac{\min_{r^\lambda} \widetilde{\mathcal{A}C}_c(r^\lambda, \tilde{q}^\lambda)}{\widetilde{\mathcal{A}C}_c(\tilde{r}_{*c}^\lambda, \tilde{q}_{*c}^\lambda)} = \infty,$$

which implies (i). Now suppose that  $\overline{\lim}_{\lambda \rightarrow \infty} \Delta_c(\lambda) < \infty$  but  $\overline{\lim}_{\lambda \rightarrow \infty} \Delta_c(\lambda) \neq \underline{\lim}_{\lambda \rightarrow \infty} \Delta_c(\lambda)$ .

Then there exist two convergence sequences, say  $\{\frac{\tilde{q}^{\lambda_k}}{\sqrt{\lambda_k}} : k \geq 1\}$  and  $\{\alpha_c(\tilde{q}^{\lambda_k}) : k \geq 1\}$ , from  $\{\frac{\tilde{q}^\lambda}{\sqrt{\lambda}} : \lambda > 0\}$  and  $\{\alpha_c(\tilde{q}^\lambda) : \lambda > 0\}$  (again, write them as  $\lambda$  sequences) such that

$$\lim_{k \rightarrow \infty} \frac{\tilde{q}^{\lambda_k}}{\sqrt{\lambda_k}} = \tilde{\tau} \neq \tau \quad \text{and} \quad \lim_{k \rightarrow \infty} \alpha_c(\tilde{q}^{\lambda_k}) = \tilde{\alpha} \neq \alpha. \quad (\text{A-68})$$

Exactly going along the line (A-63)-(A-64), we have

$$\widetilde{\mathcal{A}C}_c(\tilde{r}_{*c}^\lambda(\tilde{q}^\lambda), \tilde{q}^\lambda) = \left( \frac{K}{\tilde{\tau}} + \frac{1}{\tilde{\tau} \eta^2} \int_{z_* - \tilde{\alpha} \tilde{\tau} \eta}^{z_* + (1 - \tilde{\alpha}) \tilde{\tau} \eta} C(y) \, dy \right) \sqrt{\lambda} + o(\sqrt{\lambda}), \quad (\text{A-69})$$

where  $\tilde{\alpha}$ , using (55), satisfies

$$C(z_* - \tilde{\alpha} \tilde{\tau} \eta) = C(z_* + (1 - \tilde{\alpha}) \tilde{\tau} \eta). \quad (\text{A-70})$$

Consider function

$$g_c(\tilde{\tau}) = \frac{K}{\tilde{\tau}} + \frac{1}{\tilde{\tau} \eta^2} \int_{z_* - \tilde{\alpha} \tilde{\tau} \eta}^{z_* + (1 - \tilde{\alpha}) \tilde{\tau} \eta} C(y) \, dy.$$

If  $-g_c(\tilde{\tau})$  is strictly unimodal and its maximizer is given by  $\tau$ , then we have (i). Thus to complete the proof of (i), it is sufficient to show that the strict unimodality of  $-g_c(\tilde{\tau})$  and its maximizer is  $\tau$ . Note, by (A-70), that

$$\frac{dg_c(\tilde{\tau})}{d\tilde{\tau}} = -\frac{K}{\tilde{\tau}^2} - \frac{1}{\tilde{\tau}^2\eta^2} \int_{z_* - \tilde{\alpha}\tilde{\tau}\eta}^{z_* + (1-\tilde{\alpha})\tilde{\tau}\eta} C(y)dy + \frac{1}{\tilde{\tau}\eta} C(z_* - \tilde{\alpha}\tilde{\tau}\eta).$$

Letting  $dg_c(\tilde{\tau})/d\tilde{\tau} = 0$ , we have

$$\eta^2 K = \tilde{\tau}\eta \times C(z_* - \tilde{\alpha}\tilde{\tau}\eta) - \int_{z_* - \tilde{\alpha}\tilde{\tau}\eta}^{z_* + (1-\tilde{\alpha})\tilde{\tau}\eta} C(y)dy. \quad (\text{A-71})$$

Making a comparison with (58), we know  $\tau$  is minimizer of  $g(\tilde{\tau})$ . Considering

$$\tilde{\tau}\eta \times C(z_* - \tilde{\alpha}\tilde{\tau}\eta) - \int_{z_* - \tilde{\alpha}\tilde{\tau}\eta}^{z_* + (1-\tilde{\alpha})\tilde{\tau}\eta} C(y)dy$$

as a function of  $\tilde{\tau}\eta$ , by (A-70) and Lemma 6 in Zheng (1992), it is strict increasing. Hence, we know that

$$\begin{aligned} -\frac{K}{\tilde{\tau}^2} - \frac{1}{\tilde{\tau}^2\eta^2} \int_{z_* - \tilde{\alpha}\tilde{\tau}\eta}^{z_* + (1-\tilde{\alpha})\tilde{\tau}\eta} C(y)dy + \frac{1}{\tilde{\tau}\eta} C(z_* - \tilde{\alpha}\tilde{\tau}\eta) &< 0 \quad \text{for } \tilde{\tau} < \tau; \\ -\frac{K}{\tilde{\tau}^2} - \frac{1}{\tilde{\tau}^2\eta^2} \int_{z_* - \tilde{\alpha}\tilde{\tau}\eta}^{z_* + (1-\tilde{\alpha})\tilde{\tau}\eta} C(y)dy + \frac{1}{\tilde{\tau}\eta} C(z_* - \tilde{\alpha}\tilde{\tau}\eta) &> 0 \quad \text{for } \tilde{\tau} > \tau. \end{aligned}$$

Thus the unimodality of  $-g_c(\tilde{\tau})$  is proven.

Finally we prove (ii). Suppose that  $\overline{\lim}_{\lambda \rightarrow \infty} |\varpi^\lambda| < \infty$  and one of  $\overline{\lim}_{\lambda \rightarrow \infty} \varpi^\lambda \neq 1$  and  $\underline{\lim}_{\lambda \rightarrow \infty} \varpi^\lambda \neq 1$  holds. Then there exists a convergence sequences, say  $\{\varpi^{\lambda_k} : k \geq 1\}$  from  $\{\varpi^\lambda : \lambda > 0\}$  (again, write them as  $\lambda$  sequences) such that

$$\lim_{\lambda \rightarrow \infty} \varpi^\lambda = b \neq 1. \quad (\text{A-72})$$

Similar to (A-64),

$$\lim_{\lambda \rightarrow \infty} \frac{\widetilde{\mathcal{A}C}_c(\tilde{r}^\lambda, \tilde{q}_{*c}^\lambda)}{\sqrt{\lambda}} = \frac{K}{\tau} + \frac{1}{\tau\eta^2} \int_{b(z_* - \alpha\tau\eta)}^{b(z_* - \alpha\tau\eta) + \tau\eta} C(y)dy.$$

It is direct to verify the above function has a unique minimizer at  $b = 1$ . Hence we have (ii). ■

*Proof:* [of Proposition 7] By (10)-(11) and (49), going along the line of the proof of Propositions 3 and 4, we can show the proposition holds. Here the details are omitted. ■

*Proof:* [of Equation (79)] Suppose contrariwise that

$$\lim_{\lambda \rightarrow \infty} \sqrt{\lambda \hat{T}_*^\lambda} = \infty.$$

Then there exists a subsequence  $\{\lambda_k : k \geq 1\}$  (label it as  $\lambda$  sequence) such that

$$\lim_{k \rightarrow \infty} \sqrt{\lambda \hat{T}_*^\lambda} = \infty. \quad (\text{A-73})$$

By (75) and (78),

$$\begin{aligned} \lim_{\lambda \rightarrow \infty} \left[ C \left( \frac{z_* \theta \sqrt{\rho^\lambda} + M^\lambda(\hat{T}_*^\lambda) - \lambda \hat{T}_*^\lambda}{\theta \sqrt{\lambda \hat{T}_*^\lambda + \rho^\lambda}} \right) \sqrt{\hat{T}_*^\lambda + \frac{1}{\mu}} \right. \\ \left. - \frac{1}{\hat{T}_*^\lambda} \int_0^{\hat{T}_*^\lambda} C \left( \frac{z_* \theta \sqrt{\rho^\lambda} + M^\lambda(\hat{T}_*^\lambda) - \lambda t}{\theta \sqrt{\lambda t + \rho^\lambda}} \right) \sqrt{t + \frac{1}{\mu}} dt \right] = 0. \end{aligned} \quad (\text{A-74})$$

The remainder of the proof is divided into three cases.

$$\text{Case A } \lim_{\lambda \rightarrow \infty} \hat{T}_*^\lambda = 0; \quad \text{Case B } \lim_{\lambda \rightarrow \infty} \hat{T}_*^\lambda = a \in (0, \infty); \quad \text{Case C } \lim_{\lambda \rightarrow \infty} \hat{T}_*^\lambda = \infty.$$

For each case, we will get a contradiction with (A-74) if (A-73) holds. First we look at Case A.

This case will be further divided into subcases by (75) and (A-73):

$$\text{Subcase A.1 } \lim_{\lambda \rightarrow \infty} \hat{T}_*^\lambda = 0 \text{ and } \lim_{\lambda \rightarrow \infty} \frac{M^\lambda(\hat{T}_*^\lambda) - \lambda \hat{T}_*^\lambda}{\theta \sqrt{\lambda \hat{T}_*^\lambda + \rho^\lambda}} = -\infty.$$

Under Subcase A.1, we have

$$\lim_{\lambda \rightarrow \infty} \frac{z_* \theta \sqrt{\rho^\lambda} + M^\lambda(\hat{T}_*^\lambda) - \lambda \hat{T}_*^\lambda}{\theta \sqrt{\lambda \hat{T}_*^\lambda + \rho^\lambda}} = -\infty \quad \text{and} \quad \lim_{\lambda \rightarrow \infty} \frac{z_* \theta \sqrt{\rho^\lambda} + M^\lambda(\hat{T}_*^\lambda)}{\theta \sqrt{\rho^\lambda}} \geq z_*.$$

Then it follows from the strict convexity of  $C(\cdot)$  that

$$\lim_{\lambda \rightarrow \infty} \left| C \left( \frac{z_* \theta \sqrt{\rho^\lambda} + M^\lambda(\hat{T}_*^\lambda) - \lambda \hat{T}_*^\lambda}{\theta \sqrt{\lambda \hat{T}_*^\lambda + \rho^\lambda}} \right) - \frac{1}{\hat{T}_*^\lambda} \int_0^{\hat{T}_*^\lambda} C \left( \frac{z_* \theta \sqrt{\rho^\lambda} + M^\lambda(\hat{T}_*^\lambda) - \lambda t}{\theta \sqrt{\lambda t + \rho^\lambda}} \right) dt \right| = \infty,$$

this, in view of  $\lim_{\lambda \rightarrow \infty} \hat{T}_*^\lambda = 0$ , contradicts with (A-74).

$$\text{Subcase A.2 } \lim_{\lambda \rightarrow \infty} \hat{T}_*^\lambda = 0 \text{ and } \lim_{\lambda \rightarrow \infty} \frac{M^\lambda(\hat{T}_*^\lambda) - \lambda \hat{T}_*^\lambda}{\theta \sqrt{\lambda \hat{T}_*^\lambda + \rho^\lambda}} = b \text{ with } |b| < \infty.$$

For this subcase, by (A-73), we have

$$\lim_{\lambda \rightarrow \infty} \frac{z_* \theta \sqrt{\rho^\lambda} + M^\lambda(\hat{T}_*^\lambda) - \lambda \hat{T}_*^\lambda}{\theta \sqrt{\lambda \hat{T}_*^\lambda + \rho^\lambda}} = z_* + b \quad \text{and} \quad \lim_{\lambda \rightarrow \infty} \frac{z_* \theta \sqrt{\rho^\lambda} + M^\lambda(\hat{T}_*^\lambda)}{\theta \sqrt{\rho^\lambda}} = \infty.$$

Similar to Subcase A.1, by the strict convexity of  $C(\cdot)$ , we get a contradiction with (A-74).

Cases B and C can be analyzed along the same line. ■

## References

- Chow, Y.S., Teicher, H. 2003. *Probability Theory*. 3rd Edition, Springer.
- Rudin, W. 1976. *Principles of Mathematical Analysis*. 3rd Edition, McGraw-Hill International Editions.
- Shaked, M., Shanthikumar, J.G. 2007. *Stochastic Orders*. Springer.
- Yamazaki, G., Sigman, K., Miyazawa, M. 1992. Moments in infinite channel queues. *Computers Math. Applic.*, **24**, 1-6.
- Zheng, Y.S. 1992. On properties of stochastic inventory systems. *Management Science*, **38**, 87-103.
